# Supplementary material for: Inhibiting the P2X4 Receptor Suppresses Prostate Cancer Growth In Vitro and In Vivo, Suggesting a Potential Clinical Target
Source: MDPI journal article supplement (doi:10.3390/cells9112511), 2020-11-20
Supplement: s1 [file s1]

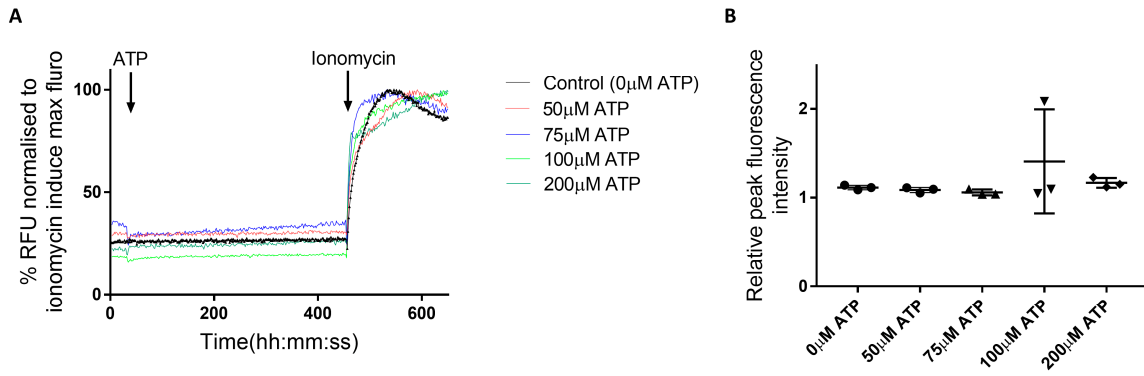

**Supplementary Figure S1.** ATP induced calcium influx can not be detected in C4-2B4 cells. The ATP (0-200  $\mu$ M) induced calcium influx in C4-2B4 cells was examined using the Fluo-4 Direct™ agent. (A) Representative ATP induced calcium influx curve over a 650-seconds period (ATP was added at 30 sec and ionomycin was added at 450 sec). RFU was normalized to the maximum fluorescence induced by ionomycin. (B) Peak fluorescence intensities were normalized to both baseline and ionomycin induced full calcium influx, and then compared among vehicle and different dosages of ATP groups. n=3 independent biological repeats.

**Supplementary Table S1.** List of TaqMan qRT-PCR gene expression assays.

| Gene   | Assay ID      |
|--------|---------------|
| P2RX1  | Hs00175686_m1 |
| P2RX2  | Hs04176268_g1 |
| P2RX3  | Hs01125554_m1 |
| P2RX4  | Hs00602442_m1 |
| P2RX5  | Hs01112471_m1 |
| P2RX6  | Hs01003997_m1 |
| P2RX7  | Hs00175721_m1 |
| P2RY1  | Hs00704965_s1 |
| P2RY2  | Hs00602525_m1 |
| P2RY4  | Hs00267404_m1 |
| P2RY6  | Hs00366312_m1 |
| P2RY11 | Hs01038858_m1 |
| P2RY12 | Hs00224470_m1 |
| P2RY13 | Hs03043902_s1 |
| P2RY14 | Hs01848195_s1 |
